# Supplementary material for: Electric-field jumps trigger a protein response preceeding the ultrafast photoisomerization
Source: Research Square preprint supplement (doi:10.21203/rs.3.rs-6272422/v1), 2025-04-10
Supplement: Supplementary file 1 [file 2a28f029cb1541fd31608fb5.pdf]

### Extended Data Figure 3: Assignment of vibrations

Using QM/MM vibrations for *all-trans* (ground state) and *13-cis* retinal (K intermediate) were calculated in protein surrounding (see supporting information). With a scaling factor of 0.955 we found the  $\nu(\text{C}=\text{NH}^+)$  at 1641 and 1607  $\text{cm}^{-1}$  and the  $\nu(\text{C}=\text{C})$  at 1525 and 1518  $\text{cm}^{-1}$  for GS, and K, respectively. This matches well with the observed peaks in  $\text{H}_2\text{O}$  (see EDF 6), and  $\text{D}_2\text{O}$ , where the  $\nu(\text{C}=\text{ND}^+)$  vibration is red-shifted by 20  $\text{cm}^{-1}$  (Figure below). These are the two strongest retinal vibrations. A weaker  $\nu(\text{C}_7\text{-C}_8, \text{C}_{11}\text{-C}_{12})$  retinal vibration is found at 1599 and 1586  $\text{cm}^{-1}$  for GS, and K, respectively. From our calculations we found two adjacent CH bending vibrations of lysine and retinal at 1441 and 1429  $\text{cm}^{-1}$  and 1425 and 1416  $\text{cm}^{-1}$  for GS and K, respectively. Another retinal  $\nu(\text{C-C})\&\delta(\text{CH})$  vibration was found at 1343 and 1348  $\text{cm}^{-1}$  for GS and K, respectively. We assigned these vibrations in the figure below (absolute accuracy 4  $\text{cm}^{-1}$ ).

Protein contributions are observed in the ES prior isomerization. We observe a broad continuum band (CB) above 1700  $\text{cm}^{-1}$  that extends up to the OH/OD stretching vibration. Moreover, amide band pairs at 1676(+)/1664(-)  $\text{cm}^{-1}$  and at 1654(-)/1643(+)  $\text{cm}^{-1}$ , as well as Trp vibrations at 1554(-)/1540(+)  $\text{cm}^{-1}$  are observed from protein groups. Additionally, contributions from carboxylic acid side chains are traced around 1700  $\text{cm}^{-1}$  (see Fig. 5). The CB decays with or faster than the ES, while the other protein contributions persist in the K intermediate. Our assignment is in line with previous investigations.<sup>16,44-48</sup>

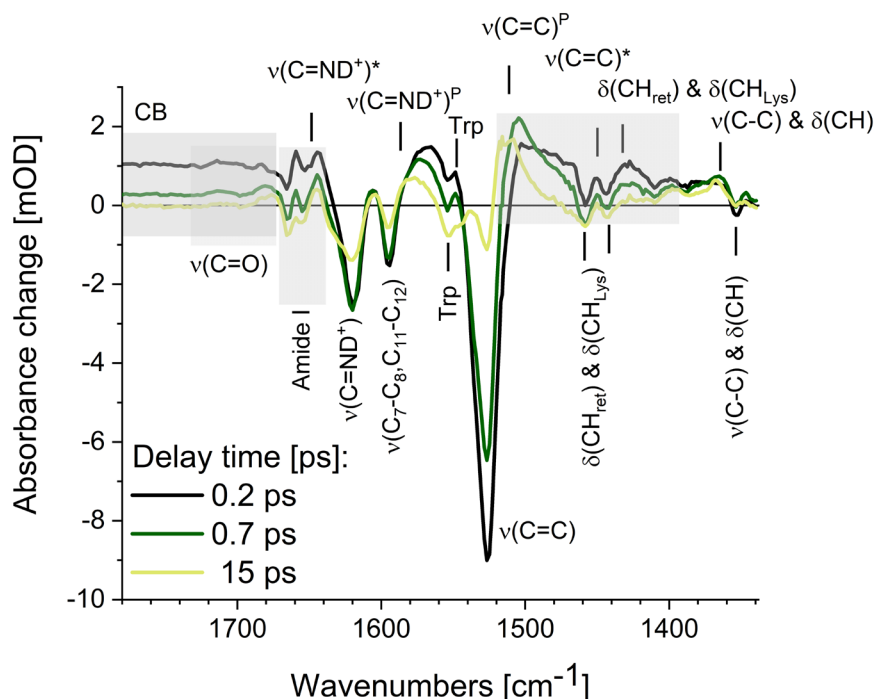

Upon photoexcitation the shift of the negative charge along the retinal backbone reduces the  $\text{C}=\text{C}$  double bond character in the ES, resulting in a red-shifted  $\nu(\text{C}=\text{C})^*$  stretching vibration.<sup>16</sup> The  $\nu(\text{C}=\text{C})^*$  appears instantaneously in Fig. 4, strongly red-shifted, from  $\sim 1515 \text{ cm}^{-1}$  to  $\sim 1460 \text{ cm}^{-1}$  at 0.2 ps. With the decay of the ES and formation of *13-cis* retinal photoproduct J the  $\nu(\text{C}=\text{C})$  band narrows and blue-shifts significantly. Relaxation from J to K intermediate with 3 ps is followed by a further narrowing and blue-shift of the  $\nu(\text{C}=\text{C})$  stretching vibration absorption band. The  $\nu(\text{C}=\text{ND}^+)$  vibration is found around 1578  $\text{cm}^{-1}$  in the J and K intermediate, also narrowing and blue-shifting from J $\rightarrow$ K transition.
