# Supplementary material for: Electric-field jumps trigger a protein response preceeding the ultrafast photoisomerization
Source: Research Square preprint supplement (doi:10.21203/rs.3.rs-6272422/v1), 2025-04-10
Supplement: Supplementary file 2 [file 2ba4af4f372fdd2a48b0726a.pdf]

## Extended Data Figure 6: Continuum band measurements

The broad continuum band (CB) in *HsBR* is also observed in  $\text{H}_2\text{O}$ -gel upon photoexcitation at 570 nm. The dynamics show a non-linear signal around zero followed by an instantaneous positive signal that decays with  $0.5 \pm 0.1$  ps either to zero or to a small negative signal. The transient at  $2899 \text{ cm}^{-1}$  presented in A) decays to a constant negative signal on a time-scale of K formation. A global analysis of dynamics in this range shows a decay of an instantaneous positive signal with 0.5 (1) ps to a negative signal in the range from 2900 to  $2700 \text{ cm}^{-1}$  as depicted in B). The remaining negative signal agrees with the reported CB observed in cryo-trapped K intermediate at 77 K.<sup>44</sup> These signatures of a CB in K intermediate are located on the high energy side between OH stretching and OH bending vibration. In  $\text{D}_2\text{O}$  we see no or negligible contributions of a negative CB in K intermediate.

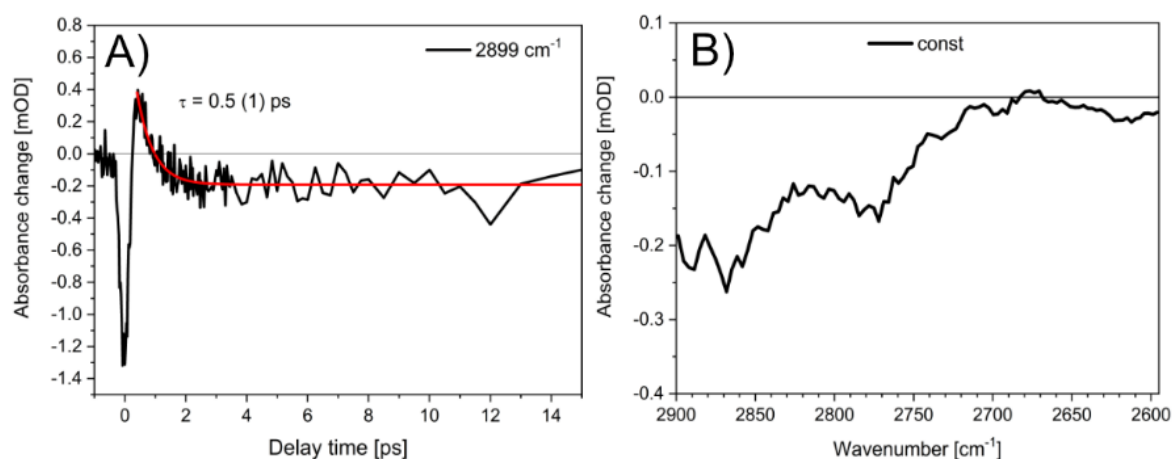

The CB is observed in  $\text{D}_2\text{O}$  (C, D, and E) and in  $\text{H}_2\text{O}$  films dried at a relative humidity of 52% (F, G, and H).<sup>[1]</sup> Absorbance difference spectra for isotropic polarization at selected delay times are presented in C and F. The CB averaged from 1700 to  $1780 \text{ cm}^{-1}$  in  $\text{D}_2\text{O}$  and from 1700 to  $1800 \text{ cm}^{-1}$  in  $\text{H}_2\text{O}$  film show similar decay constants of 0.4 (1) ps (in D), and 0.3 (1) ps (in G), respectively. At delay times averaged from 1 to 3 ps the isotropic absorbance difference spectra show negative and positive peak pairs in the carbonyl region around  $1720 \text{ cm}^{-1}$ . Spectral shifts between E and H are due to D/H exchange.

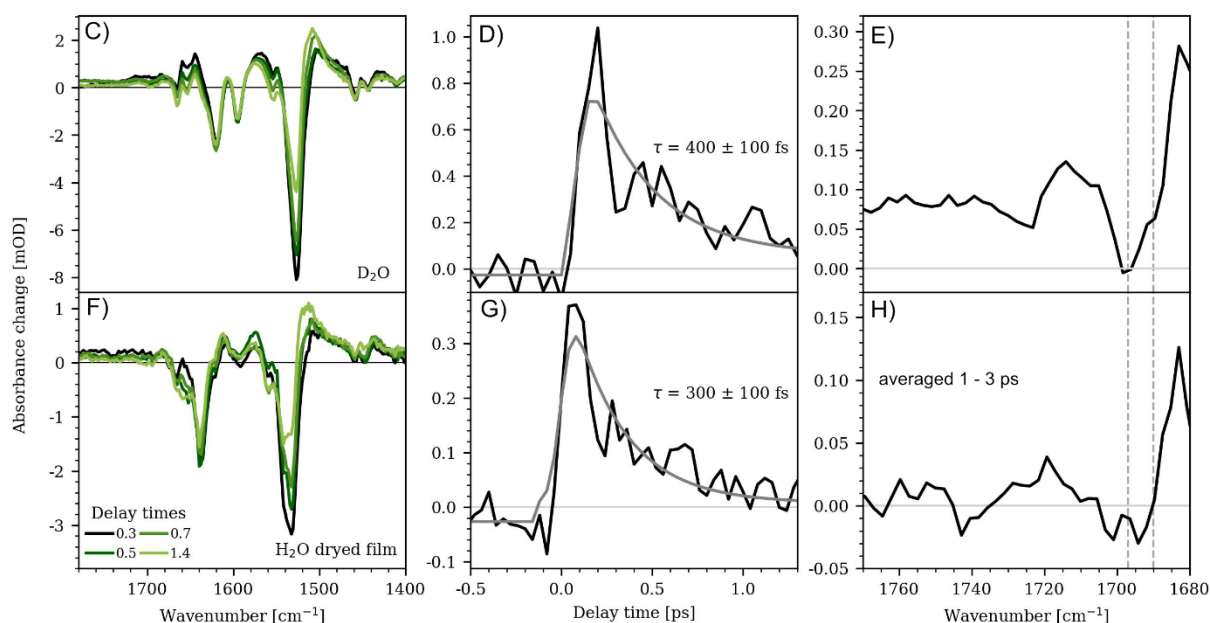

[1] O'Brien, F.E.M. The Control of Humidity by Saturated Salt Solutions. *J. Sci. Instrum.* **25**, 73 (1948)
