# Supplementary material for: Electric-field jumps trigger a protein response preceeding the ultrafast photoisomerization
Source: Research Square preprint supplement (doi:10.21203/rs.3.rs-6272422/v1), 2025-04-10
Supplement: Supplementary file 9 [file f92437f7b54a385610234aee.pdf]

# Extended Data Figure 4: Continuum band measurements

All presented datasets show *HsBR* dynamics in D<sub>2</sub>O solution. In A) absorbance difference spectra from 1867 cm<sup>-1</sup> to 1580 cm<sup>-1</sup> (data for transient in Fig. 4 inset) are shown for parallel polarization, i.e. pump and probe beams are parallel polarized. The CB is clearly visible as a strong, broad, and mainly structureless band from 1850 cm<sup>-1</sup> to at least 1700 cm<sup>-1</sup>. The positive CB signal is strongest at early delay times (0.2 ps black line) and decays to zero on a sub-picosecond time-scale. We cannot determine how much influence the CB has in the spectral range below 1700 cm<sup>-1</sup>, because of other overlapping positive contributions from C=ND<sup>+</sup> and C=C stretching vibrations in the excited state (ES). In B) absorbance difference spectra for isotropic polarization (*A*<sub>iso</sub>) as in Fig. 4 are shown.

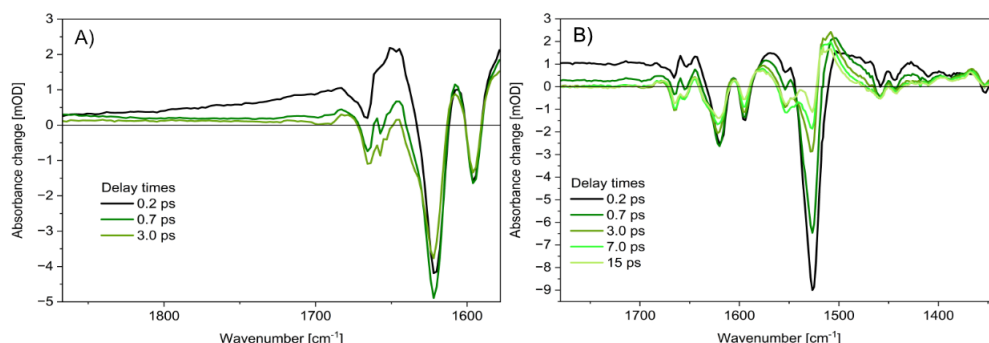

Decay associated spectra from a global fit of the dataset in B) are presented in C), and D) for parallel (*A*<sub>||</sub>, solid lines) and perpendicular (*A*<sub>⊥</sub>, dashed lines) polarization. Global fitting gives time constants of 0.7 (1) ps and 4.5 (3) ps. From the dichroic ratio  $D = A_{||}/A_{\perp}$  one can calculate the relative angle between electronic transition dipole moment and vibrational transition dipole moment. *D* ranges from 3 to 0.5 corresponding to angles from 0° to 90°. Polarization resolved data around 1640 cm<sup>-1</sup> indicate a blue-shifted  $\nu(\text{C}=\text{ND}^+)^*$  vibration in the ES, probably due to increased electron density at the SB, and a red-shifted absorption in the J and K intermediate. Upon photoexcitation a band pair is visible at 1554(-) / 1540(+) cm<sup>-1</sup> assigned to Trp vibrations that is persistent in J and K photoproduct.<sup>23,37</sup>

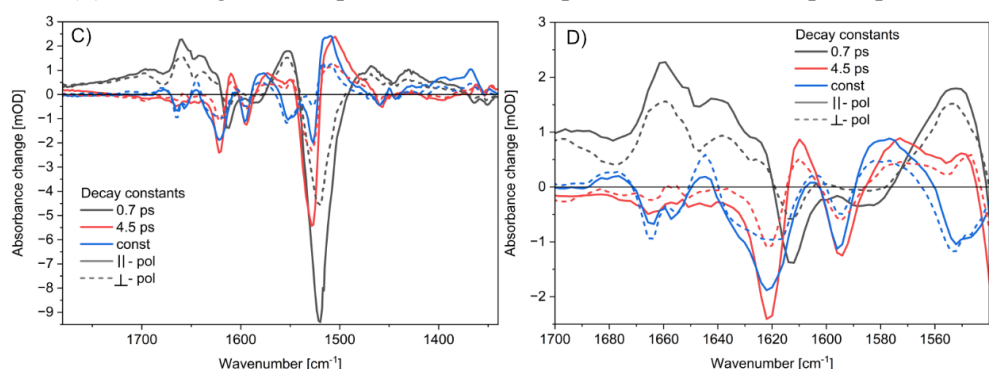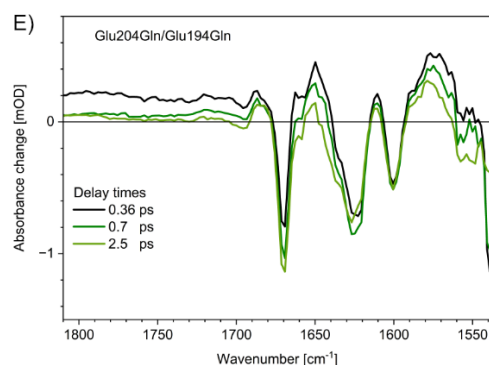

In E) isotropic absorbance difference spectra of the Glu204Gln/Glu194Gln variant of *HsBR* are presented for delay times 0.36 ps (0.32 – 0.4 ps), 0.7 ps (0.68 – 0.72 ps), and 2.5 ps (2.3 – 2.8 ps). The CB around 1780 cm<sup>-1</sup> is clearly visible and decays to nearly zero within a picosecond. Signal strengths are similar to *HsBR* WT, except for the amide I region around 1665 cm<sup>-1</sup> where the signals are stronger in the variant.<sup>45</sup>
