# Supplementary material for: Electric-field jumps trigger a protein response preceeding the ultrafast photoisomerization
Source: Research Square preprint supplement (doi:10.21203/rs.3.rs-6272422/v1), 2025-04-10

### Extended Data Figure 5: Continuum band measurements

All presented datasets show isotropic polarized *HsBR* dynamics in  $D_2O$  solution. Transients of the spectrally averaged CB together with mono-exponential simulations are depicted in B and E. Absorbance difference spectra averaged from 1 to 3 ps reflecting photoproduct formation are shown in C and F in the carbonyl spectral range from 1760 to 1680  $cm^{-1}$ .

In the first graph absorbance difference spectra for selected delay times are presented at pD 5.5 (A, B, and C) and pD 7 (D, E, and F). CB transients are spectrally averaged from 1700 to 1780  $cm^{-1}$  at pD 5.5 in C and from 1700 to 1835  $cm^{-1}$  at pD 7.0 in E. Absorbance difference spectra averaged from 1 to 3 ps indicating very similar features in the carbonyl spectral range (C and F).

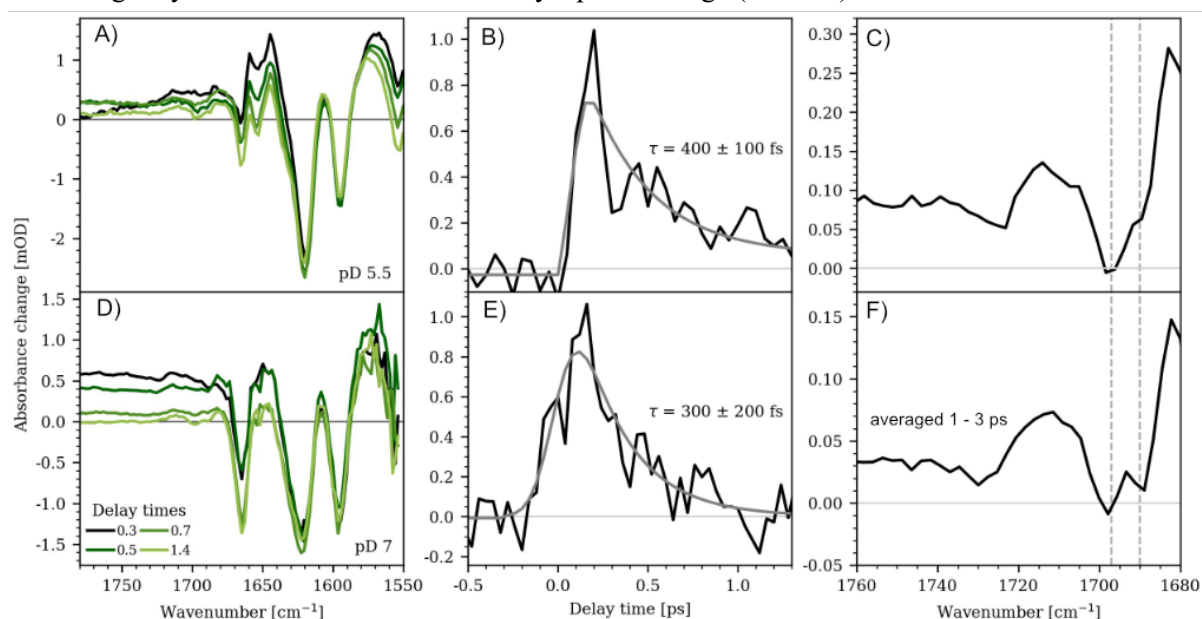

Measurements on the *HsBR* Glu194Gln/Glu204Gln variant were also performed (D, E, and F) and are compared to WT *HsBR* in the next graph: A, B, and C depict are the same as in the graph above. D shows isotropic absorbance difference spectra of the variant, E displays the transient of the CB averaged spectrally from 1700 to 1810  $cm^{-1}$  and a simulation with a decay constant of 0.3 (1) ps. F shows the averaged absorbance difference spectrum from 1 to 3 ps. Here, we see that the negative dip at 1698  $cm^{-1}$  is missing or very strongly reduced in the Glu194Gln/Glu204Gln variant compared to WT. The CB shows nearly identical features and decay times in WT and the variant.

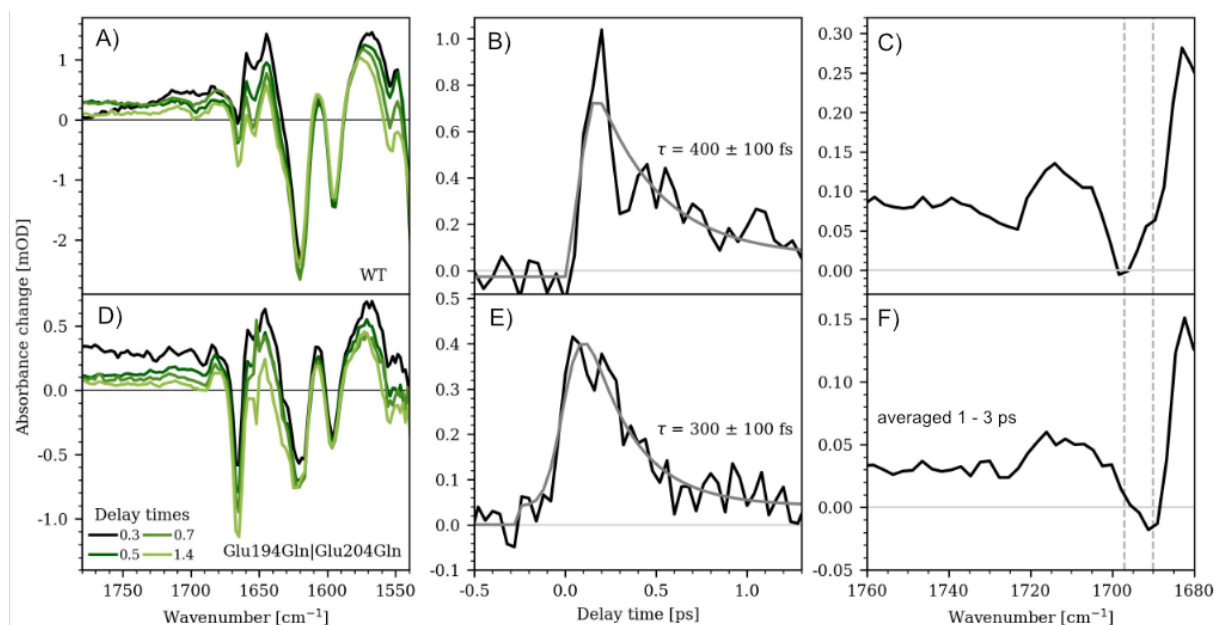

Supplement: Supplementary file 10 [file fb6ec42de9fcd40613e7858d.pdf]
